# Supplementary material for: Estimating COVID-19 lockdown effectiveness: Analysis of the 2020 Danish mink lockdown
Source: Research Square preprint supplement (doi:10.21203/rs.3.rs-4135968/v1), 2024-03-21
Supplement: Supplementary file [file f16de83fdd9a7645d177be2d.pdf]

# New restrictions and recommendations in seven North Jutland municipalities

Valid from 9 November 2020, except restrictions for restaurants, cafes, bars, pubs etc., which apply from 7 November 2020

The seven municipalities are Hjørring, Frederikshavn, Læsø, Brønderslev, Jammerbugt, Thisted and Vesthimmerland

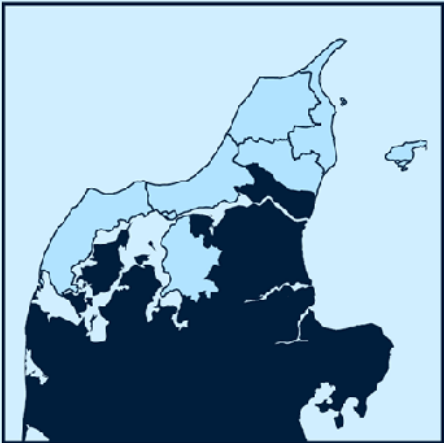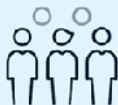

## Assemblies

Ceiling on gatherings of 10 people. This also applies to private parties held outside private homes and gardens.

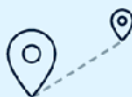

## Mobility

Residents of the seven municipalities are strongly encouraged not to cross municipal borders, except for essential and urgent reasons. Everyone else is strongly encouraged not to visit the mentioned municipalities.

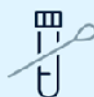

## Massive testing effort

Everyone residing in the mentioned municipalities is encouraged to be tested. There will be local announcements that you should wait for.

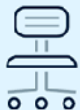

## Workplaces

Public and private workplaces are strongly encouraged to send home all employees who do not carry out critical functions. Public and private workplaces outside the municipalities in question are encouraged to send all employees residing in the municipalities in question who do not carry out critical functions home.

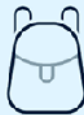

## Day care, primary school and youth education, etc.

Grades 5-8 are sent home for distance learning. Other classes can have attendance, but with a heightened focus on keeping distance, hygiene etc. Attendance is reduced to 50% at youth and adult education etc.

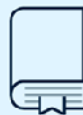

## Higher education etc.

Students with residence in one of the mentioned municipalities transfer to digital teaching and exams without attendance. It also applies for students in higher education educations in Aalborg, who reside in the municipalities concerned.

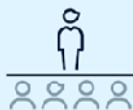

## Cultural institutions

All cultural institutions and premises where exercise is carried out cultural activities, are closed to public access. That applies to both indoor and outdoor areas.

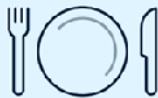

## Restaurants, cafes, etc.

Must close for serving to consumption at the point of sale (however incl possibility of take-away).

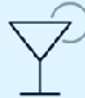

## Bars, pubs, etc.

Must close for serving to consumption at the point of sale (however incl possibility of take-away).

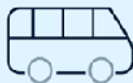

## Collective transport

Public passenger traffic is closed with e.g. bus, train and ferry in and out and across them mentioned municipalities, but not for driving with school bus and the like.

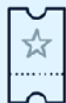

## Sports and leisure facilities

Indoor premises where exercise is carried out sports, association and leisure activities, be closed. In indoor activities, max 10 people participate.

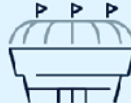

## Professional sports

The exception for events of up to 500 seated guests are removed. Thus is closed to spectators.

See further details and possible exceptions at [coronasmitte.dk](https://coronasmitte.dk)

Hotline: +45 7020 0233

[coronasmitte.dk](https://coronasmitte.dk)

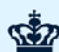

HEALTH  
AND THE MINISTRY OF THE ELDERLY

POLICE
